# Supplementary material for: Structure Alignment-driven Cross-Graph Modeling for Functional RNA Design
Source: Research Square preprint supplement (doi:10.21203/rs.3.rs-7169944/v1), 2025-09-12
Supplement: Supplementary file 1 [file 7cba0286ff5060c7af3be0da.docx]

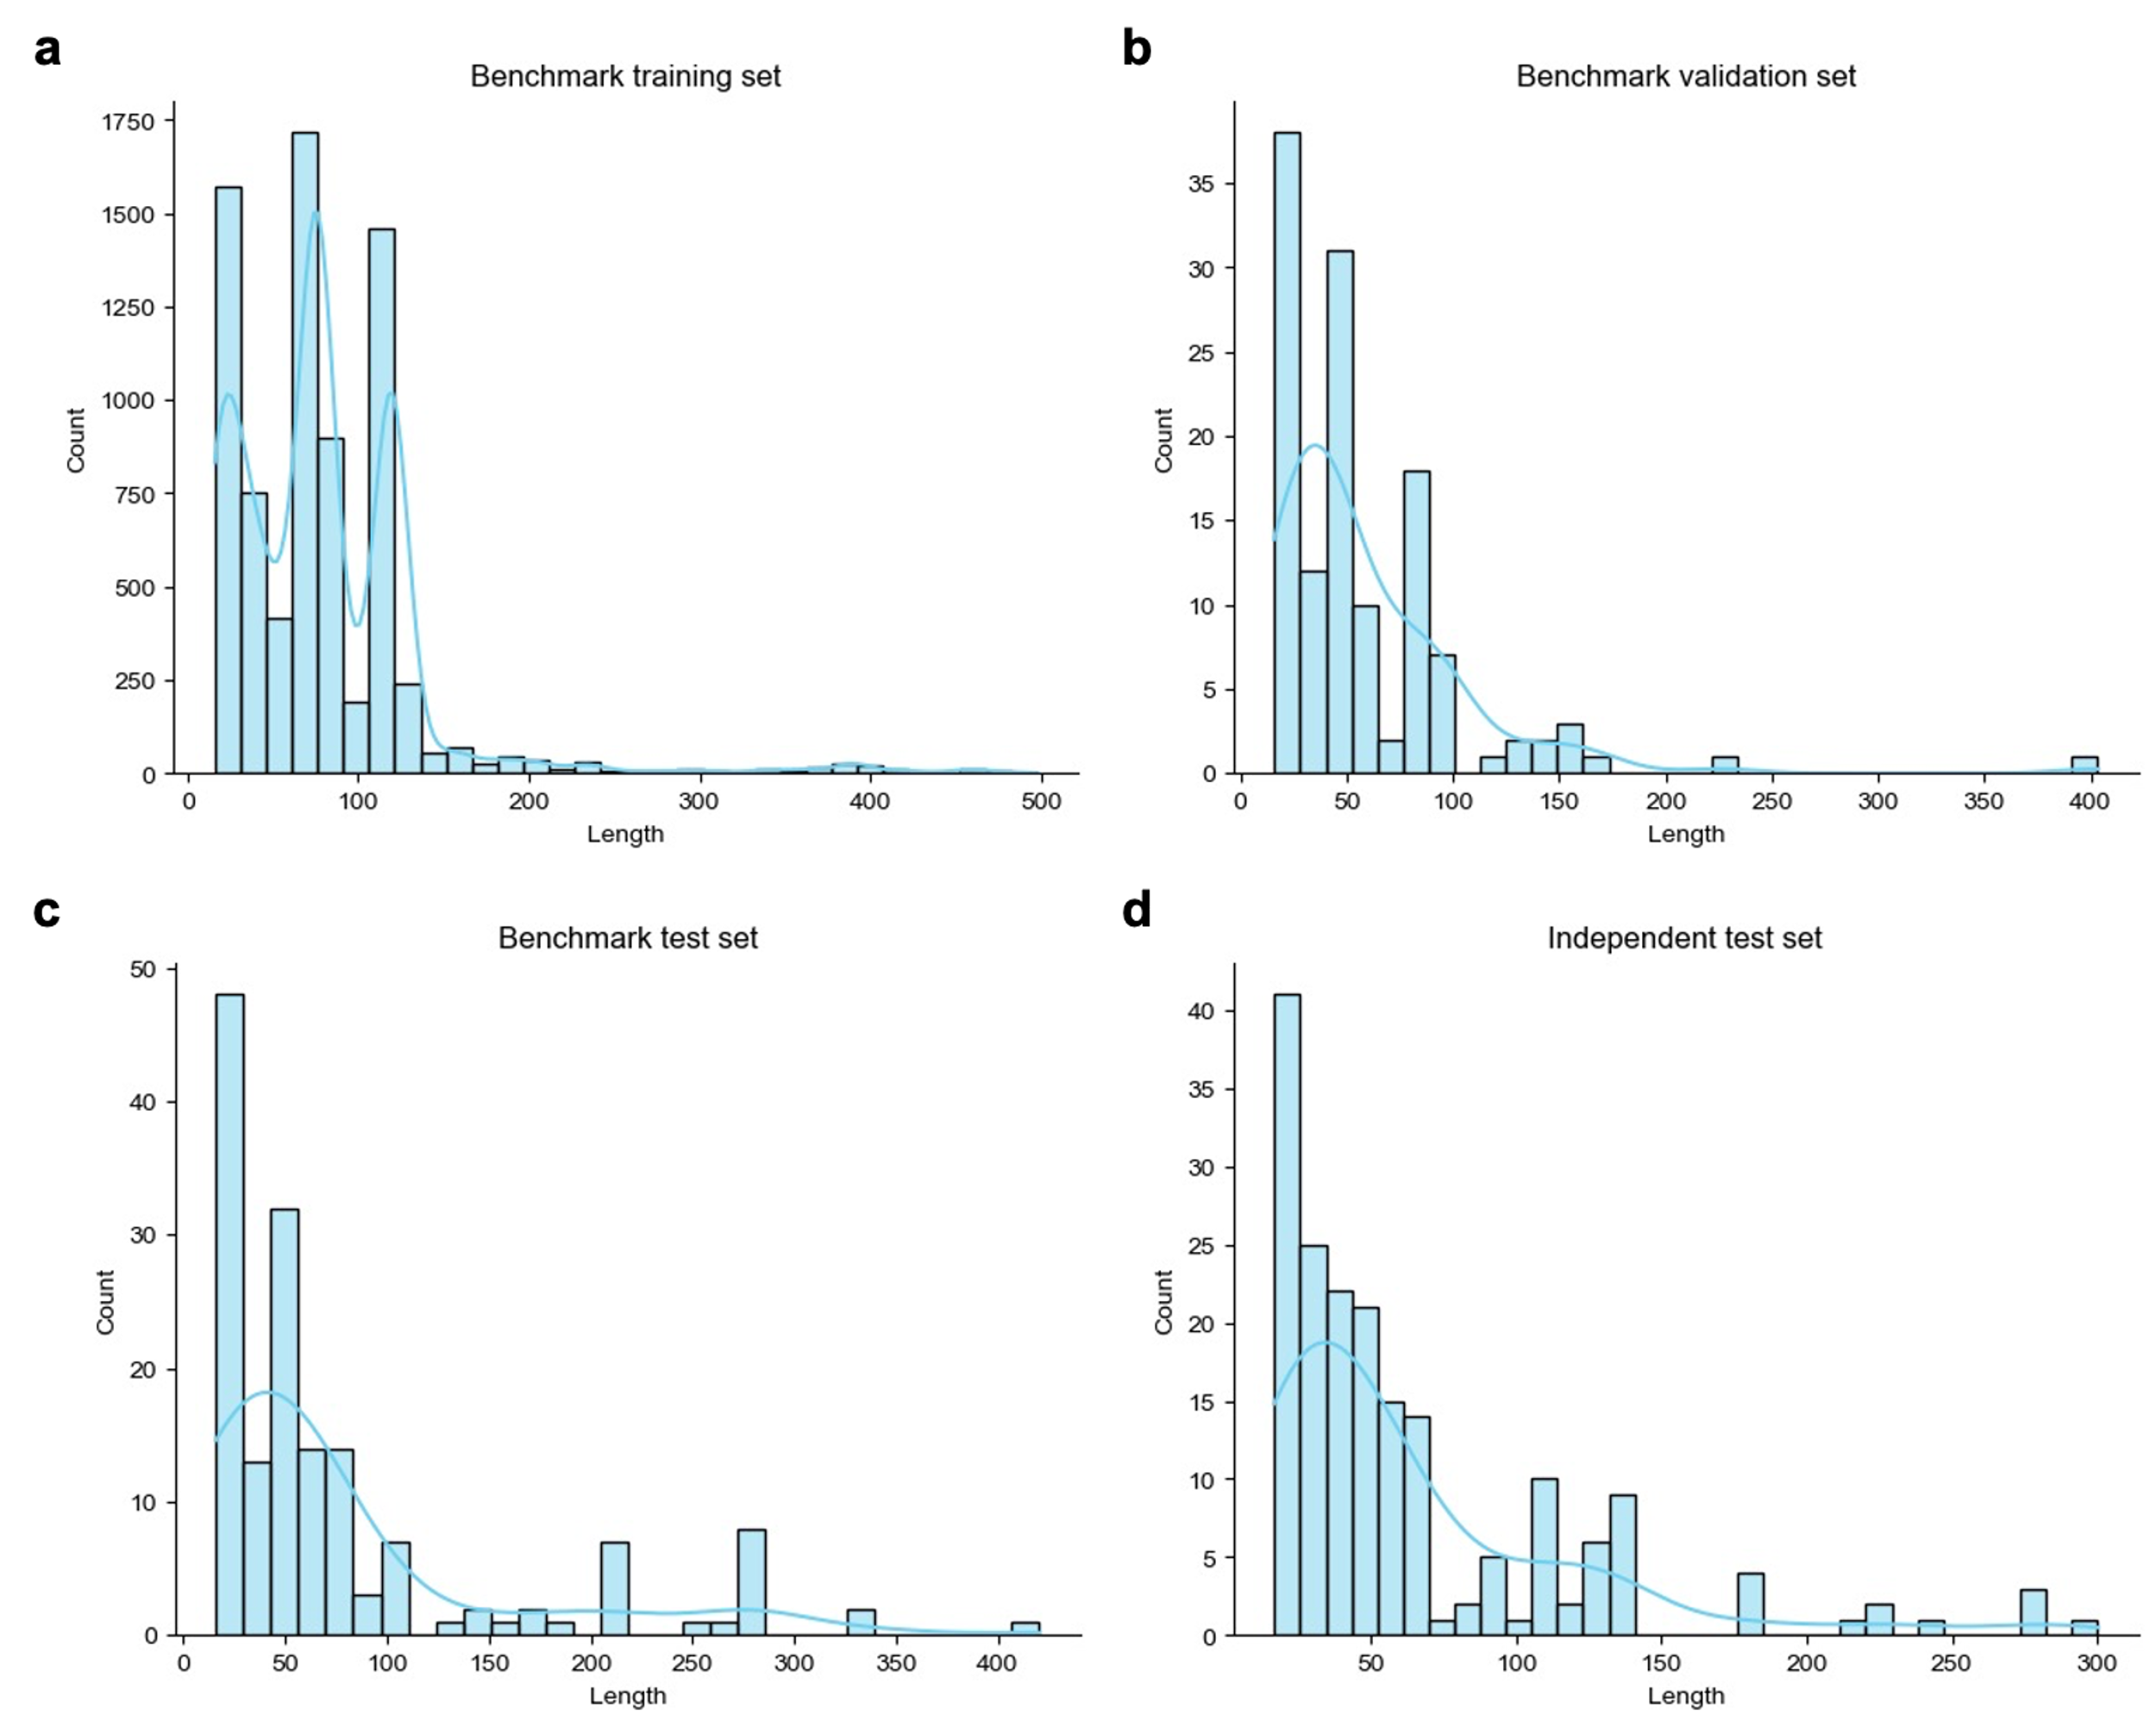


**Fig. S1 | Sequence length distribution.** Distribution of sequence lengths in the **(a)** benchmark training set, **(b)** benchmark validation set, **(c)** benchmark test set, and **(d)** independent test set.


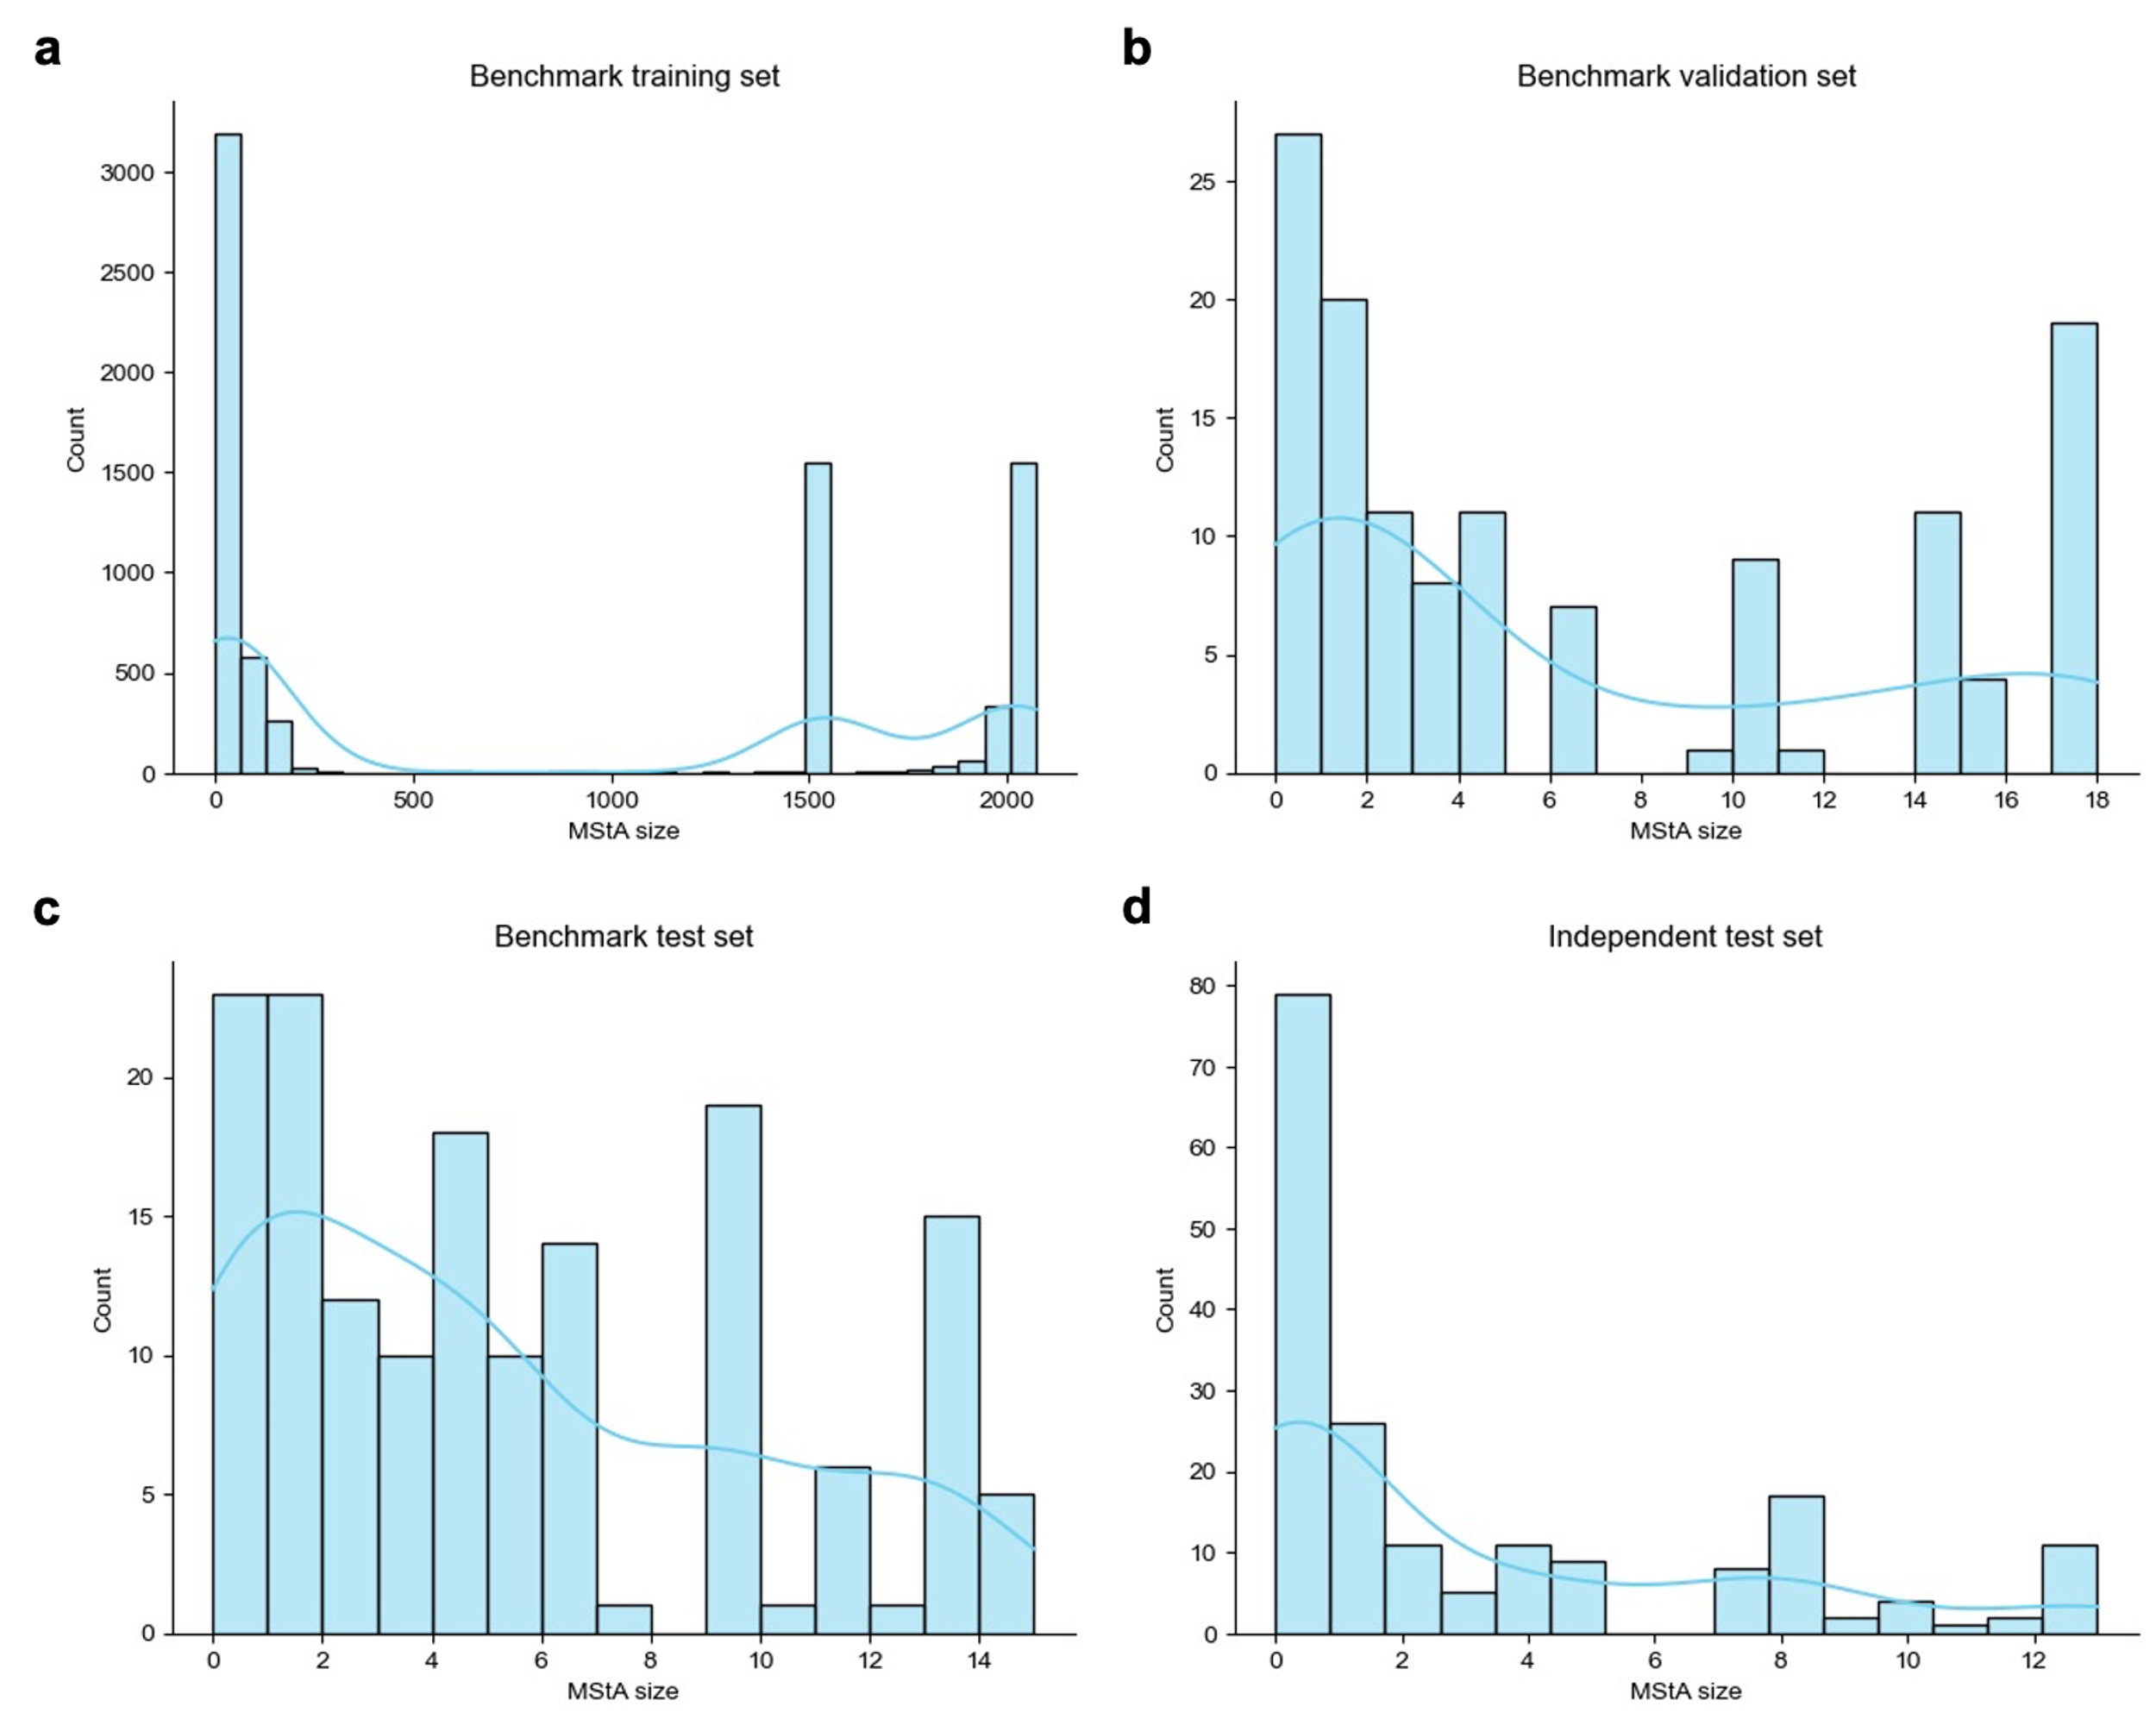


**Fig. S2 | MStA size distribution.** Distribution of MStA sizes in the **(a)** benchmark training set, **(b)** benchmark validation set, **(c)** benchmark test set, and **(d)** independent test set.


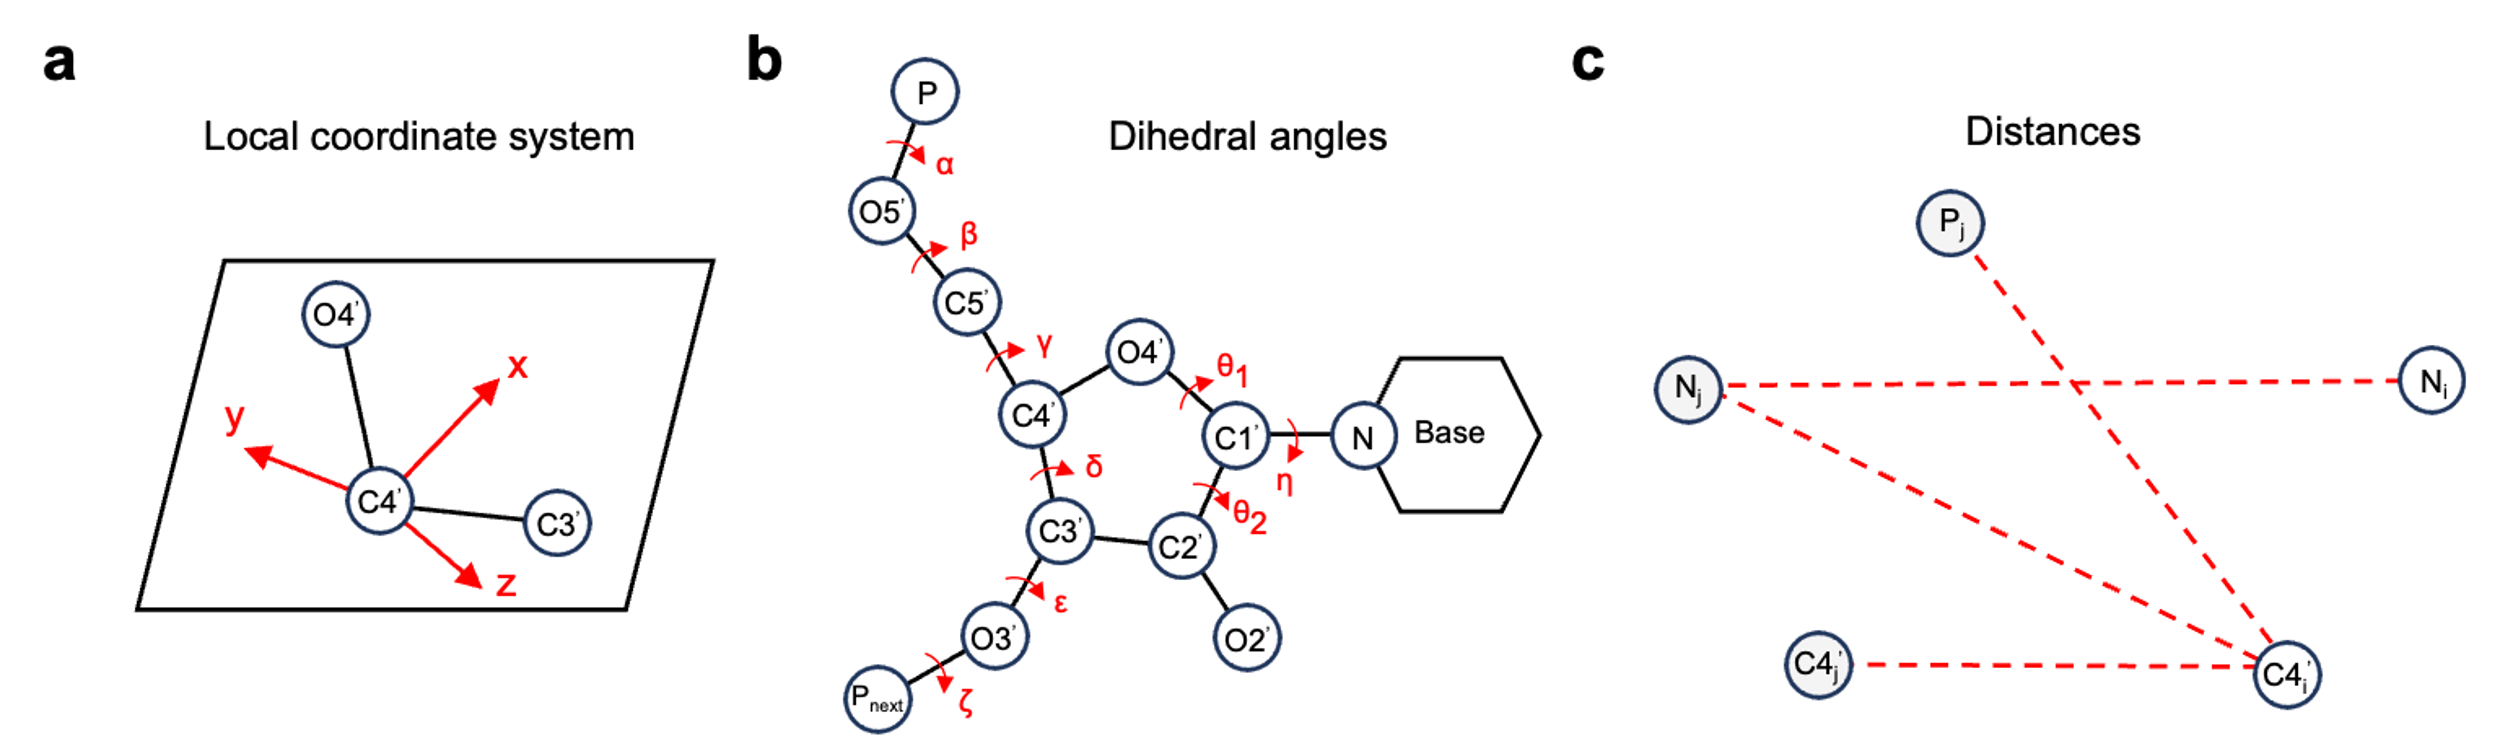


**Fig. S3 | Extracted features from RNA backbone structures. a,** Illustration of the local coordinate system defined by the C3’, C4’, and O4’ atoms. **b,** Six backbone torsion angles (-), one base orientation-related dihedral angle (), and two additional dihedral angles C2’–C1’–O4’–C4’ () and O4’–C1’–C2’–O2’ () **c,** Inter-residue distances extracted to characterize structural features between adjacent nucleotides.


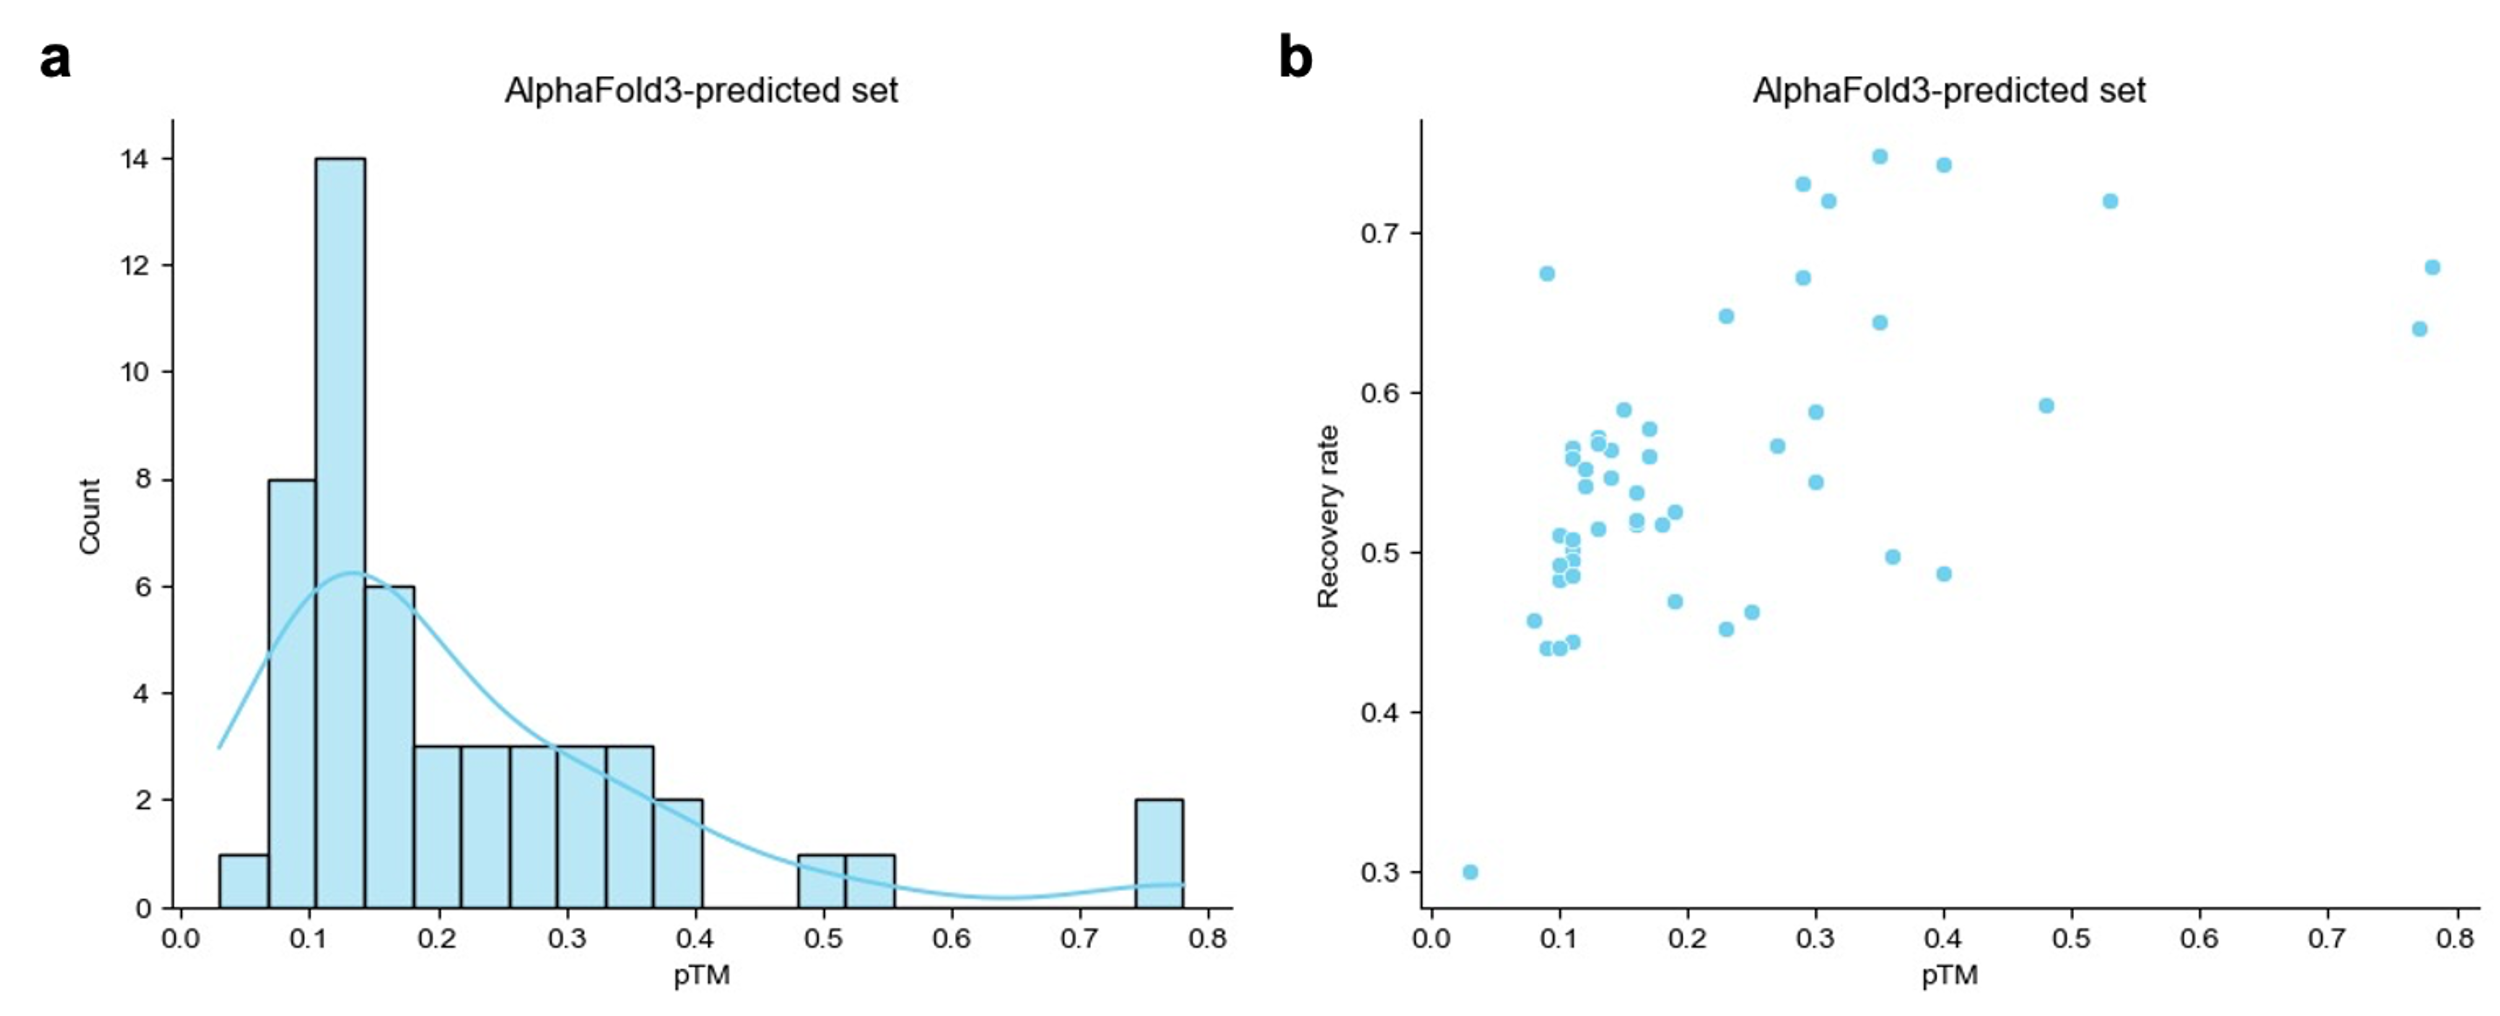


**Fig. S4 | Analysis of the AlphaFold3-predicted set. a,** Distribution of predicted TM-score (pTM) values in the AlphaFold3-predicted set. **b,** Correlation between pTM values and residue recovery rates, showing a positive trend.
